# Supplementary material for: Cancer cachexia in a mouse model of oxidative stress
Source: PubMed Central journal article supplement (PMC7749559; doi:10.1002/jcsm.12615), 2020-09-12

# Figure S1

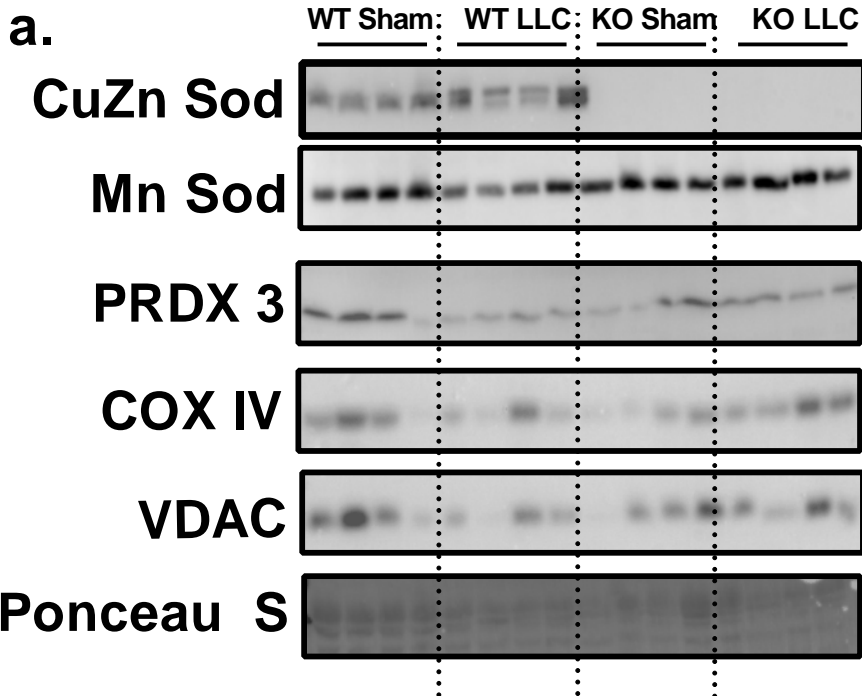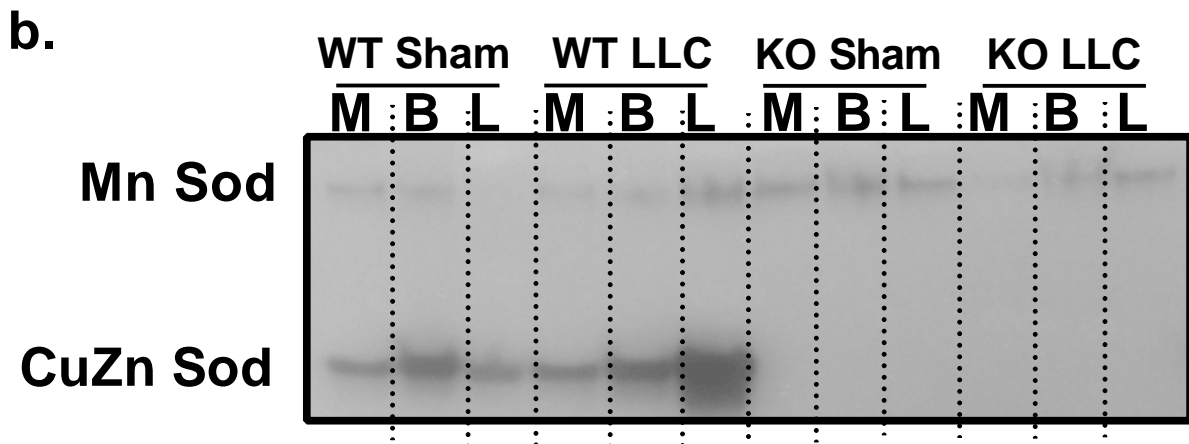

Supplement: JCSM-11-1688-s001.pdf [file JCSM-11-1688-s001.pdf]
